# Supplementary material for: Mixing iron oxide nanoparticles with different shape and size for tunable magneto-heating performance
Source: Royal Society of Chemistry journal article supplement (doi:10.1039/d0nr09121a), 2021-01-01
Supplement: d0nr09121a1.pdf [file d0nr09121a1.pdf]

## Electronic Supplementary Information

### Mixing iron oxide nanoparticles with different shape and size for tunable magneto-heating performance

Jesus G. Ovejero<sup>1</sup>, Federico Spizzo<sup>2</sup>, M. Puerto Morales<sup>1\*</sup>, Lucia Del Bianco<sup>2\*</sup>

<sup>1</sup> *Dept. Energía, Medio Ambiente y Salud, Instituto de Ciencia de Materiales de Madrid, CSIC, Cantoblanco, E-28049 Madrid, Spain*

<sup>2</sup> *Dipartimento di Fisica e Scienze della Terra, Università di Ferrara, I-44122 Ferrara, Italy*

\*Corresponding authors. E-mail address: puerto@icmm.csic.es, lucia.delbianco@unife.it

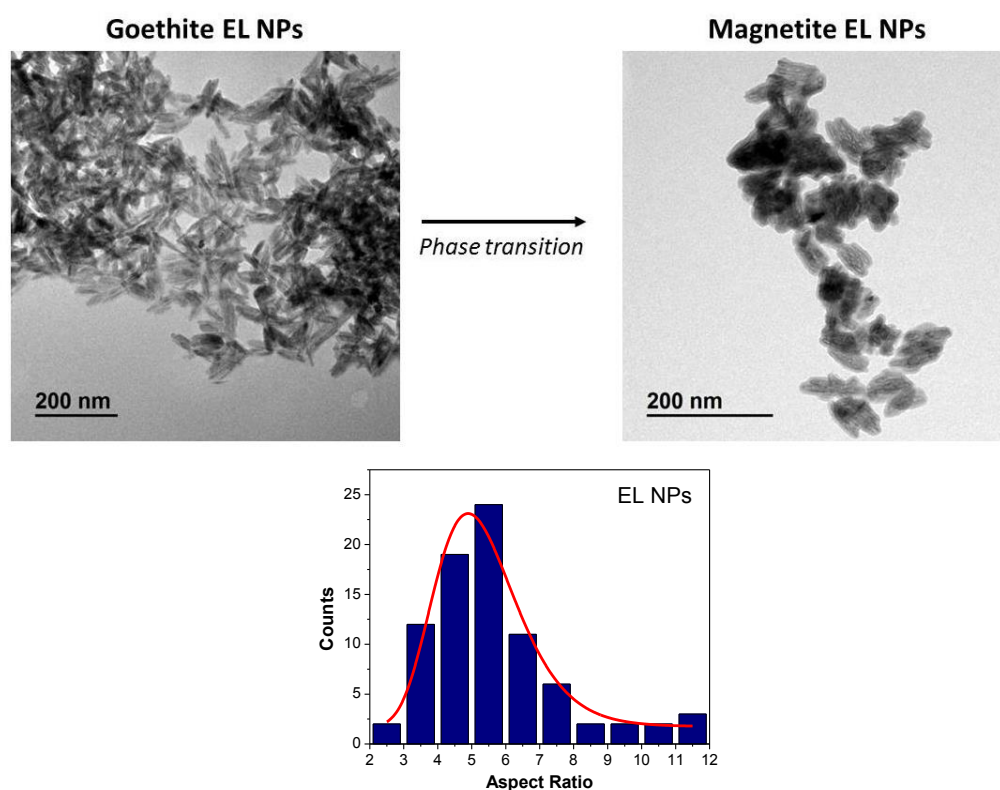

**Fig. S1** High panel: TEM images showing the precursor elongated goethite NPs and the final magnetite EL NPs, prepared following the synthetic method described in the article (Scheme 1). Low panel: distribution for the aspect ratio of the core of EL NPs.

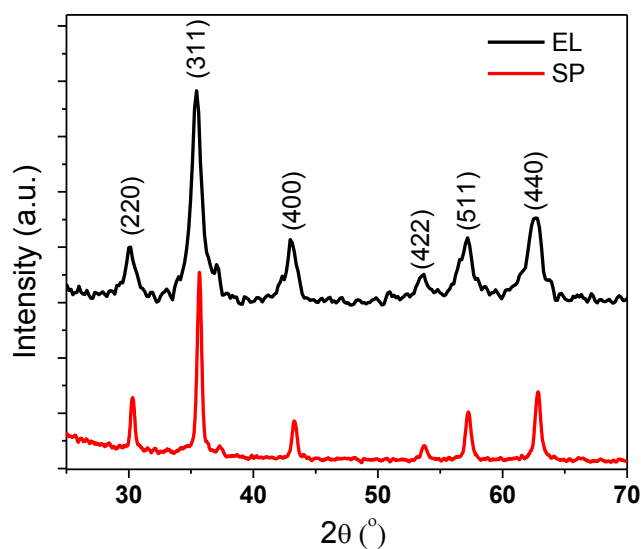

**Fig. S2** X-ray diffraction patterns (smoothed for representation) for samples of EL and SP NPs in the powder forms. The diffraction peak positions match with the inverse spinel structure of the magnetite/maghemite iron oxide phases. The silica coating in EL NPs is amorphous and does not give rise to visible Bragg reflections.

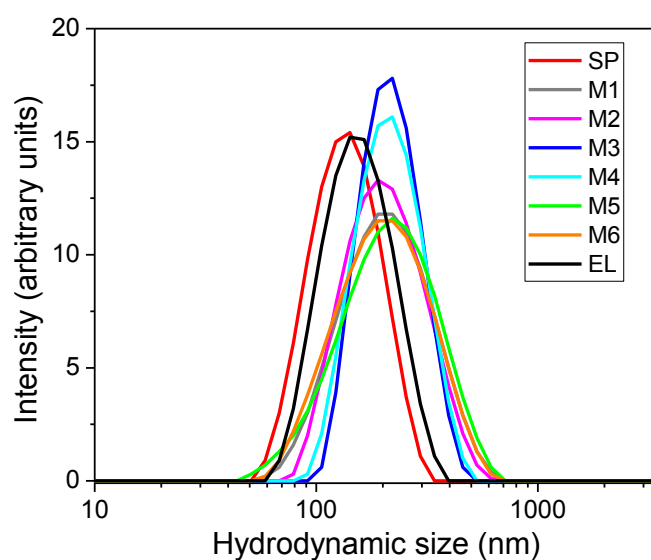

**Fig. S3** Hydrodynamic size distributions measured by DLS on the parent EL and SP NPs and on the mixed samples.

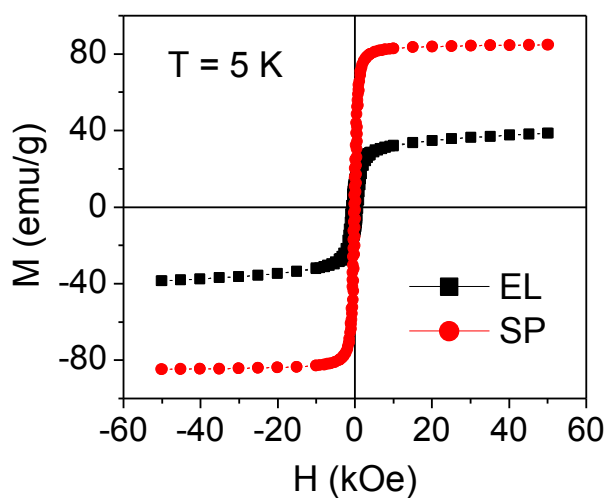

**Fig. S4** Magnetization loops measured at  $T = 5$  K on samples of EL and SP NPs in the powder form.

**Table S1.** Saturation magnetization values of the mixed samples

| Sample | $M_S$<br>(emu/g)<br>$T = 5$ K | $M_{S\_calc}$<br>(emu/g)<br>$T = 5$ K |
|--------|-------------------------------|---------------------------------------|
| M1     | $74 \pm 4$                    | $74 \pm 6$                            |
| M2     | $69 \pm 4$                    | $62 \pm 5$                            |
| M3     | $58 \pm 3$                    | $56 \pm 4$                            |
| M4     | $48 \pm 3$                    | $50 \pm 4$                            |
| M5     | $48 \pm 3$                    | $44 \pm 4$                            |
| M6     | $43 \pm 3$                    | $41 \pm 3$                            |

The values of saturation magnetization  $M_S$  at  $T = 5$  K are obtained by dividing the measured magnetic moment by the weight of the NPs dispersed in the solution absorbed by the cotton swab.  $M_{S\_calc}$  is the saturation magnetization calculated considering the sample composition and  $M_S$  of EL and SP NPs (reported in the article).

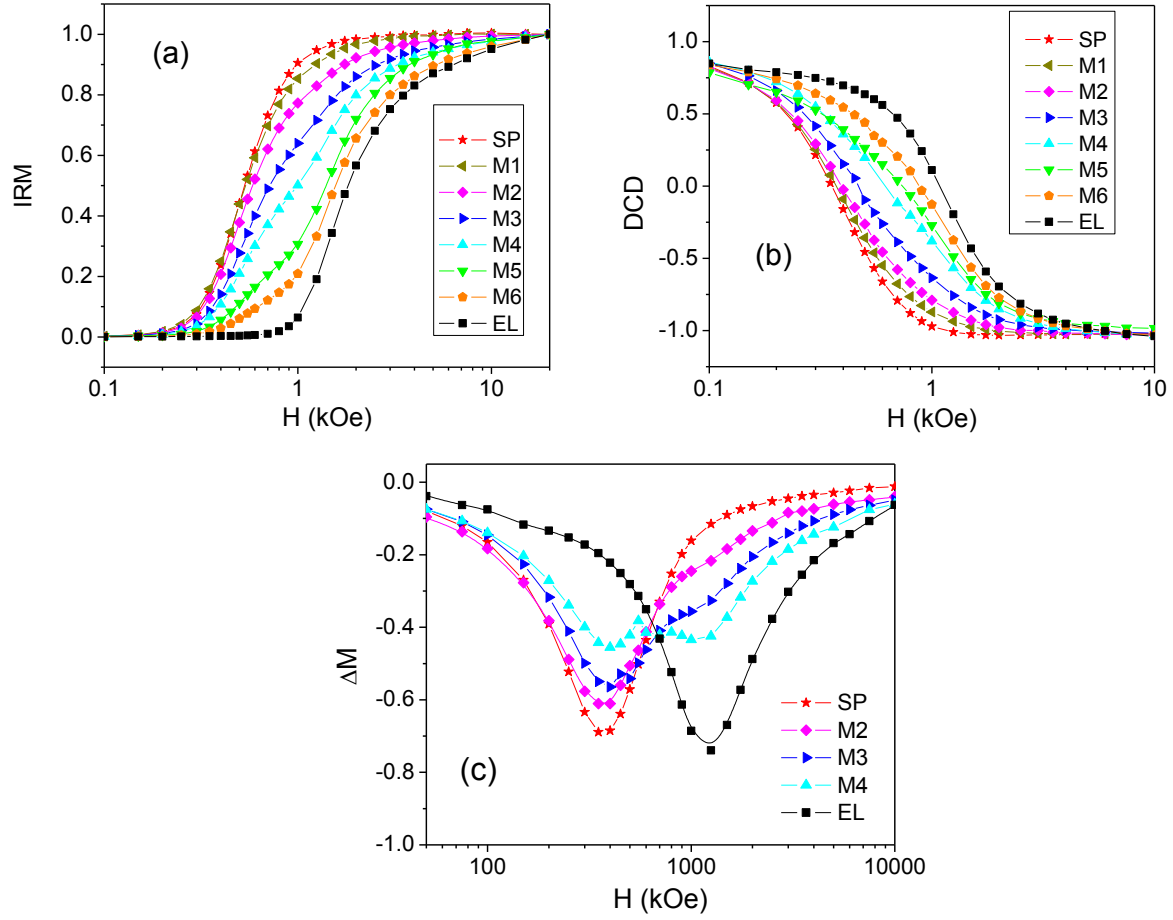

**Fig. S5** (a) Isothermal remanent magnetization (IRM) and (b) dc demagnetization remanence (DCD) measured at  $T = 5$  K on all the investigated samples. (c)  $\Delta M$ -plots at  $T = 5$  K for SP, EL and some representative mixed samples (M2, M3 and M4).

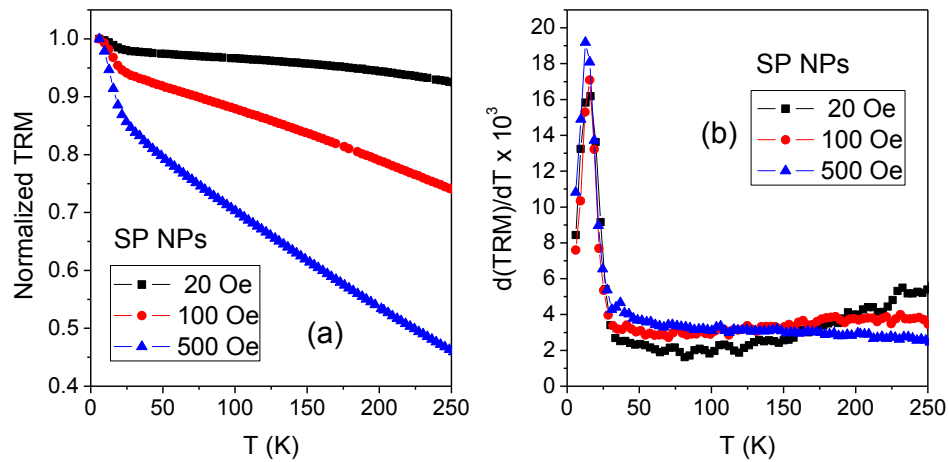

**Fig. S6** Thermoremanent magnetization (TRM) vs.  $T$  measured on SP NPs for three different values of the magnetic field previously applied to the sample; the curves are normalized to their initial value at  $T = 5$  K. (b) Temperature derivatives of the curves in (a).

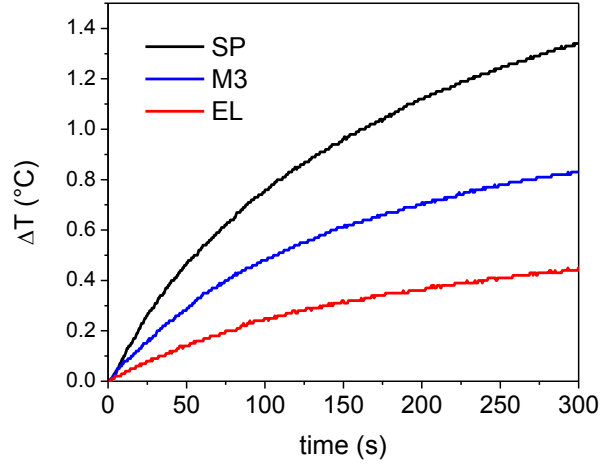

**Fig. S7** (a) Heating curves for the indicated samples, subjected to an alternating magnetic field of amplitude  $H_{\max} = 100$  Oe and frequency  $f_m = 96$  kHz.

### ESTIMATION of $T_{\text{Squid}}$

We use the relation reported in the article as equation (2) to estimate the value of temperature  $T_{\text{Squid}}$  that, operating with a SQUID at  $f_m = 0.01$  Hz ( $t_m = 100$  s), corresponds to the same magnetic relaxing state probed at  $T = 294$  K operating at  $f_m = 96$  kHz ( $t_m = 1 \times 10^{-5}$  s).

In fact, equation 2 can be reformulated in this way:

$$\ln(t_m f_0) T = KV/k_B$$

Considering constant  $KV/k_B$ ,  $T_{\text{Squid}}$  is obtained from the relation:

$$[\ln(1 \times 10^{-5} f_0)] 294 = [\ln(100 f_0)] T_{\text{Squid}}$$

As indicated in the article,  $f_0$  is assumed equal to  $10^9$  Hz.
